# Supplementary material for: Pilot study to evaluate school safety zone built environment interventions
Source: HighWire-hosted journal article supplement (doi:10.1136/injuryprev-2021-044299), 2021-08-30

**Supplementary Table 1: Descriptive statistics of speed outcomes stratified by posted speed limit (30 km/h, 40 km/hr, 50 km/hr, 60 km/hr)**

| Groups                          | Intervention Schools (n = 30) |            |       |             | Control Schools (n=45) |    |            |      |             |      |
|---------------------------------|-------------------------------|------------|-------|-------------|------------------------|----|------------|------|-------------|------|
|                                 | N                             | Mean (Pre) | SD    | Mean (Post) | SD                     | N  | Mean (Pre) | SD   | Mean (Post) | SD   |
| All Schools                     | 30                            |            |       |             |                        | 45 |            |      |             |      |
| Proportion Over 30 km/h (%)     |                               | 0.71       | 0.27  | 0.69        | 0.26                   |    | 0.79       | 0.19 | 0.80        | 0.20 |
| Proportion Over Speed Limit (%) |                               | 0.44       | 0.28  | 0.40        | 0.26                   |    | 0.48       | 0.24 | 0.47        | 0.23 |
| 85th Percentile Speed (km/h)    |                               | 46.51      | 10.54 | 45.72       | 11.69                  |    | 48.88      | 8.95 | 48.55       | 8.39 |
| Schools in 30 km/h zones        | 7                             |            |       |             |                        | 7  |            |      |             |      |
| Proportion Over 30 km/h (%)     |                               | 0.45       | 0.20  | 0.46        | 0.20                   |    | 0.63       | 0.18 | 0.59        | 0.24 |
| Proportion Over Speed Limit (%) |                               | 0.45       | 0.20  | 0.46        | 0.20                   |    | 0.63       | 0.18 | 0.59        | 0.24 |
| 85th Percentile Speed (km/h)    |                               | 35.85      | 4.60  | 36.13       | 5.97                   |    | 40.48      | 4.26 | 39.94       | 6.68 |
| Schools in 40 km/h zones        | 18                            |            |       |             |                        | 27 |            |      |             |      |
| Proportion Over 30 km/h (%)     |                               | 0.75       | 0.25  | 0.71        | 0.25                   |    | 0.76       | 0.18 | 0.79        | 0.17 |
| Proportion Over Speed Limit (%) |                               | 0.46       | 0.31  | 0.39        | 0.28                   |    | 0.41       | 0.22 | 0.43        | 0.23 |
| 85th Percentile Speed (km/h)    |                               | 46.74      | 8.06  | 44.74       | 7.64                   |    | 45.95      | 5.32 | 46.22       | 4.95 |
| Schools in 50 km/h zones        | 3                             |            |       |             |                        | 9  |            |      |             |      |
| Proportion Over 30 km/h (%)     |                               | 0.95       | 0.01  | 0.94        | 0.02                   |    | 0.97       | 0.03 | 0.98        | 0.02 |
| Proportion Over Speed Limit (%) |                               | 0.47       | 0.31  | 0.47        | 0.34                   |    | 0.64       | 0.16 | 0.58        | 0.13 |
| 85th Percentile Speed (km/h)    |                               | 59.71      | 9.53  | 59.51       | 10.27                  |    | 62.23      | 3.96 | 59.99       | 2.98 |
| Schools in 60 km/h zones        | 2                             |            |       |             |                        | 2  |            |      |             |      |
| Proportion Over 30 km/h (%)     |                               | 0.95       | 0.02  | 0.97        | 0.02                   |    | 0.91       | 0.07 | 0.89        | 0.03 |
| Proportion Over Speed Limit (%) |                               | 0.18       | 0.10  | 0.18        | 0.21                   |    | 0.13       | 0.14 | 0.16        | 0.18 |
| 85th Percentile Speed (km/h)    |                               | 61.89      | 3.79  | 67.42       | 19.40                  |    | 57.79      | 7.93 | 58.55       | 8.98 |

**Supplementary Table 2: Unadjusted and Adjusted Models for the Proportion Exceeding 30 km/h, Exceeding Speed Limit and 85<sup>th</sup> Percentile, for Intervention and Control Groups (OR = Odds Ratio, CI = Confidence Intervals)**

|                                                              | Intervention<br>(n=30)      |                             | Control<br>(n=45)           |                             |
|--------------------------------------------------------------|-----------------------------|-----------------------------|-----------------------------|-----------------------------|
|                                                              | Unadjusted OR<br>(95% CI)   | Adjust OR<br>(95% CI)       | Unadjusted OR<br>(95% CI)   | Adjust OR<br>(95% CI)       |
| <b>Model 1: Proportion Exceeding 30 km/h OR (95% CI)</b>     |                             |                             |                             |                             |
| Post vs Pre                                                  | 0.88 (0.74, 1.06)           | 0.88 (0.73, 1.06)           | 1.10 (0.87, 1.38)           | 1.10 (0.88, 1.37)           |
| Presence of Traffic Calming                                  | 1.33 (0.59, 3.00)           | <b>2.72 (1.06, 7.04)</b>    | 1.17 (0.65, 2.12)           | 0.78 (0.45, 1.35)           |
| Posted Speed Limit (30 km/h as reference)                    |                             |                             |                             |                             |
| 40 km/h                                                      | <b>4.17 (1.71, 10.16)</b>   | <b>6.20 (2.10, 18.30)</b>   | <b>1.86 (1.05, 3.65)</b>    | <b>2.59 (1.28, 5.00)</b>    |
| 50 km/h                                                      | <b>7.56 (1.80, 31.82)</b>   | <b>23.35 (4.24, 128.71)</b> | <b>0.70 (3.63, 20.86)</b>   | <b>21.29 (8.39, 54.04)</b>  |
| 60 km/h                                                      | <b>8.06 (1.51, 42.99)</b>   | <b>70.94 (8.39, 599.49)</b> | <b>4.23 (1.07, 16.76)</b>   | <b>5.33 (1.30, 21.77)</b>   |
| <b>Model 2: Proportion Exceeding Speed Limit OR (95% CI)</b> |                             |                             |                             |                             |
| Post vs Pre                                                  | <b>0.79 (0.66, 0.96)</b>    | <b>0.79 (0.66, 0.96)</b>    | 0.98 (0.81, 1.19)           | 0.98 (0.81, 1.18)           |
| Presence of Traffic Calming                                  | <b>2.58 (1.19, 5.57)</b>    | <b>3.53 (1.25, 9.92)</b>    | 1.00 (0.56, 1.78)           | 0.78 (0.42, 1.43)           |
| Posted Speed Limit (30 km/h as reference)                    |                             |                             |                             |                             |
| 40 km/h                                                      | 0.94 (0.36, 2.46)           | 0.92 (0.28, 3.00)           | <b>0.40 (0.19, 0.92)</b>    | <b>0.42 (0.19, 0.94)</b>    |
| 50 km/h                                                      | 1.06 (0.24, 4.67)           | 1.08 (0.18, 6.61)           | 1.02 (0.44, 2.41)           | 1.02 (0.39, 2.72)           |
| 60 km/h                                                      | 0.47 (0.08, 2.67)           | 0.54 (0.06, 5.14)           | <b>0.12 (0.03, 0.53)</b>    | <b>0.07 (0.01, 0.38)</b>    |
| <b>Model 3: 85% percentile speed (co-efficients, 95% CI)</b> |                             |                             |                             |                             |
| Post vs Pre                                                  | -0.78 (-6.53, 4.97)         | -0.78 (-4.41, 2.84)         | -0.33 (-3.97, 3.30)         | -0.33 (-2.42, 1.75)         |
| Presence of Traffic Calming                                  | <b>-0.98 (-1.33, -0.62)</b> | <b>6.96 (3.08, 10.84)</b>   | <b>-0.92 (-1.18, -0.67)</b> | -1.20 (-3.42, 1.02)         |
| Posted Speed Limit (30 km/h as reference)                    |                             |                             |                             |                             |
| 40 km/h                                                      | <b>10.89 (4.10, 17.68)</b>  | <b>10.86 (6.39, 15.32)</b>  | <b>5.46 (1.16, 9.76)</b>    | <b>5.97 (3.00, 8.95)</b>    |
| 50 km/h                                                      | <b>23.86 (13.35, 34.37)</b> | <b>23.95 (17.10, 30.80)</b> | <b>21.75 (16.64, 26.85)</b> | <b>21.22 (17.64, 24.8)</b>  |
| 60 km/h                                                      | <b>26.05 (13.83, 38.26)</b> | <b>33.64 (25.21, 42.06)</b> | <b>17.30 (9.18, 25.43)</b>  | <b>17.62 (11.96, 23.27)</b> |

**Supplementary Table 3: Unadjusted and Adjusted Models for Active School Transportation, by Intervention and Control Group\***

| Variable                         | Group 2 (2018) Intervention Schools<br>(n=21) |                          | Control Schools<br>(n=45) |                         |
|----------------------------------|-----------------------------------------------|--------------------------|---------------------------|-------------------------|
|                                  | Unadjusted OR<br>(95% CI)                     | Adjusted OR<br>(95% CI)  | Unadjusted OR<br>(95% CI) | Adjusted OR<br>(95% CI) |
| Post vs pre-intervention         | 1.22 (0.97, 1.54)                             | 1.24 (0.99, 1.56)        | 0.99 (0.80, 1.23)         | 0.99 (0.80, 1.23)       |
| Presence of adult crossing guard | <b>1.66 (1.03, 2.68)</b>                      | <b>1.69 (1.07, 2.69)</b> | 0.98 (0.68, 1.41)         | 0.98 (0.68, 1.42)       |

\*adjusted for presence of school crossing guards

**Supplementary Figure 1: Proportion of Schools with Risky Driver Behaviours, Pre- and Post-Measurements at Control Schools (n=45)**

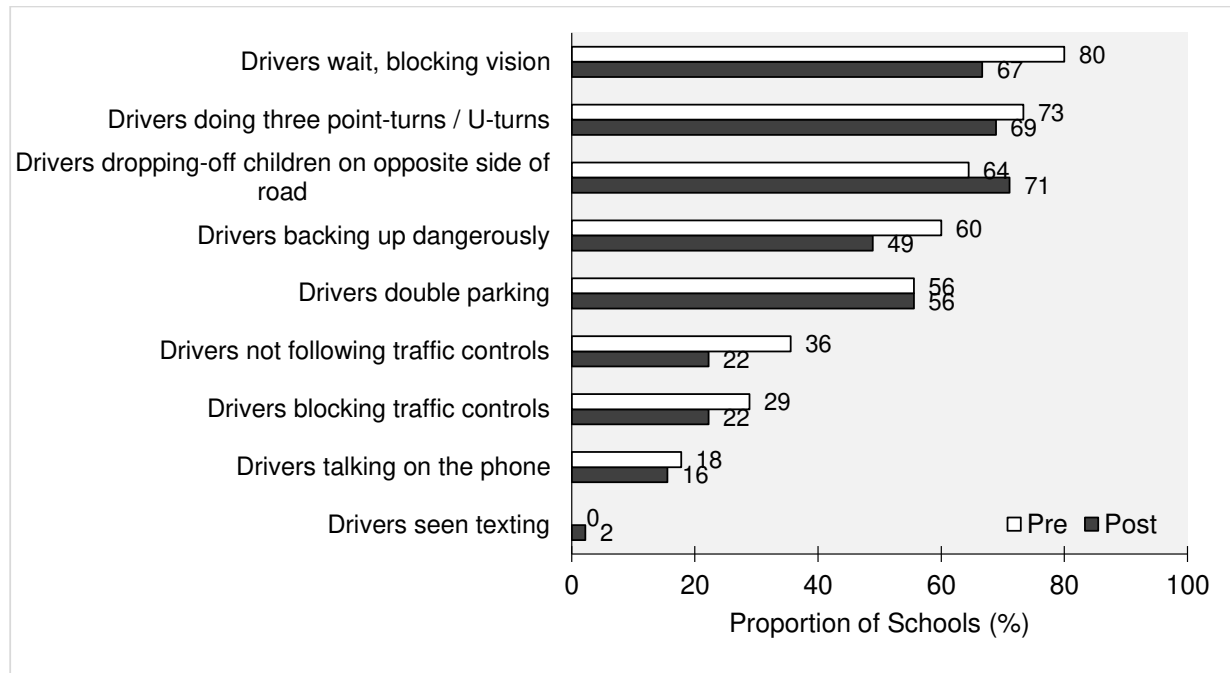

Supplement: injuryprev-2021-044299supp001_data_supplement.pdf [file injuryprev-2021-044299supp001_data_supplement.pdf]
